# Supplementary material
Source: PubMed Central journal article supplement (PMC6812682)

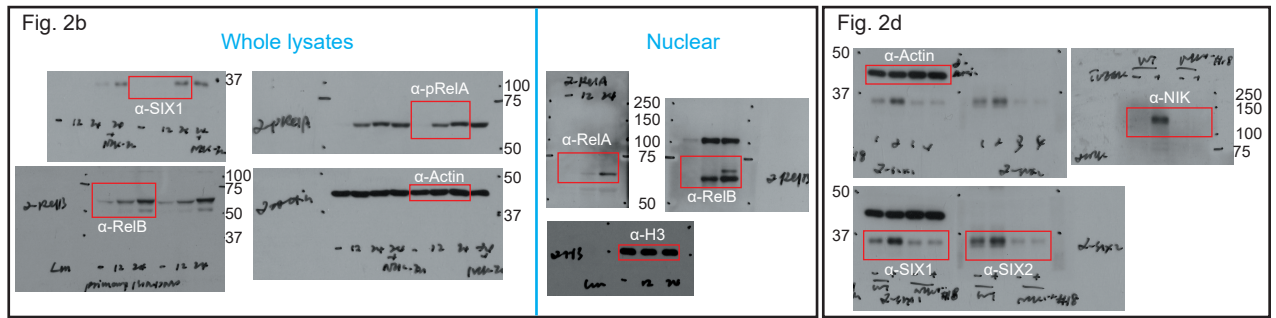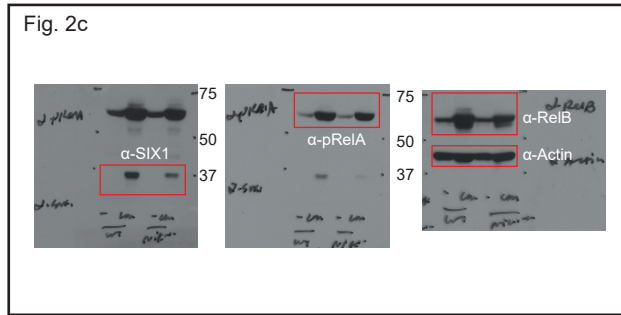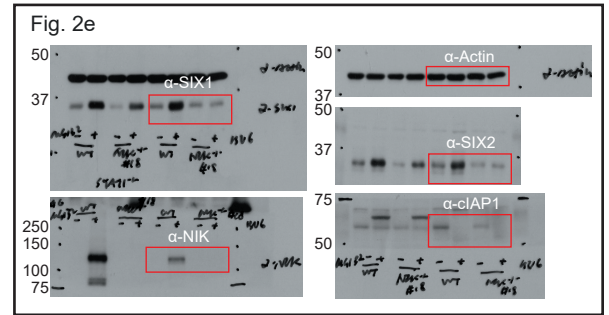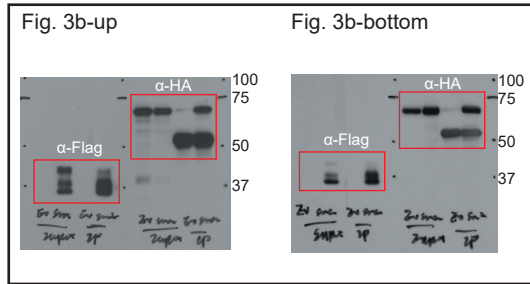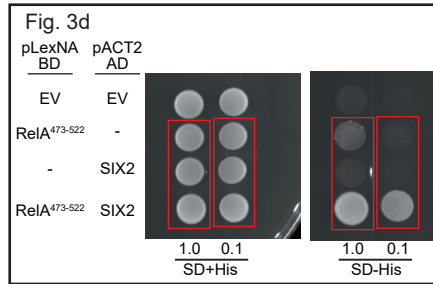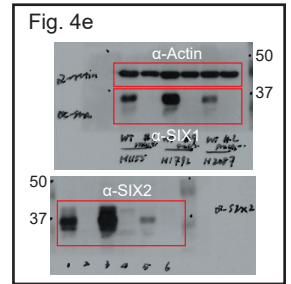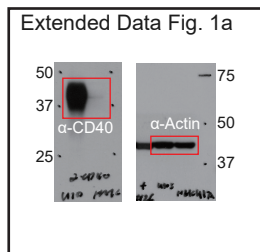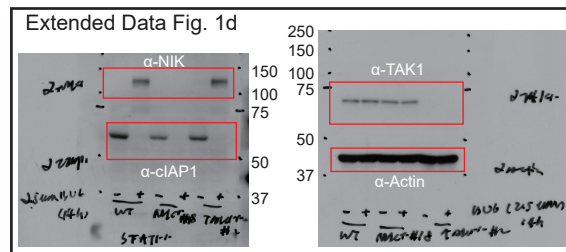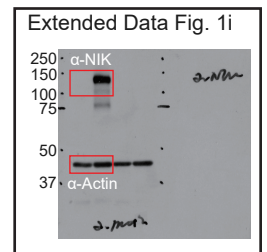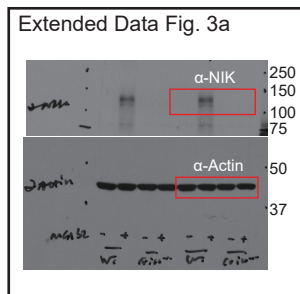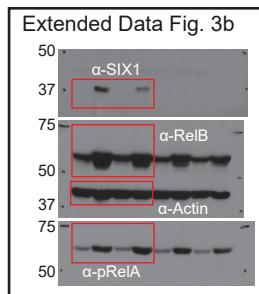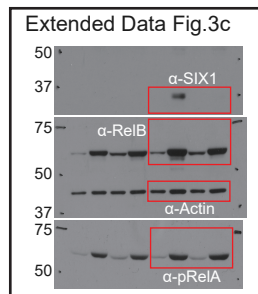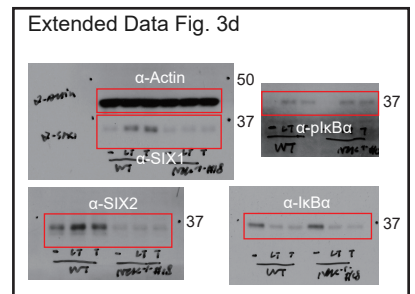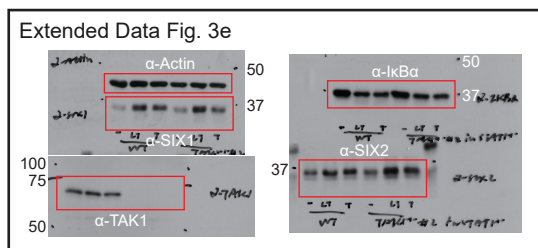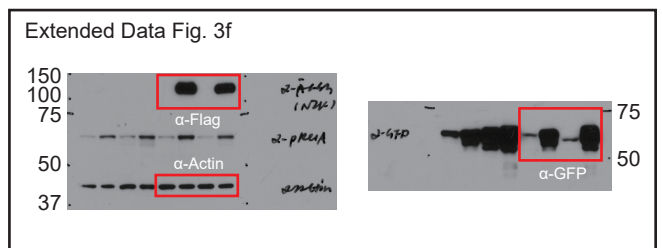

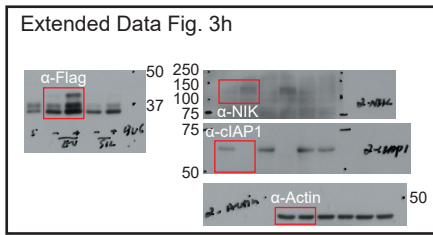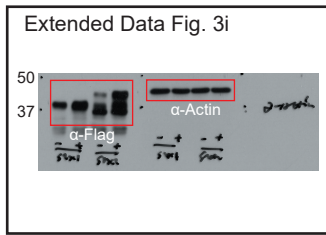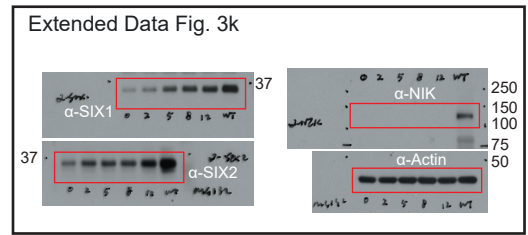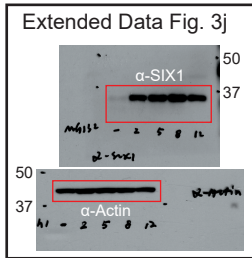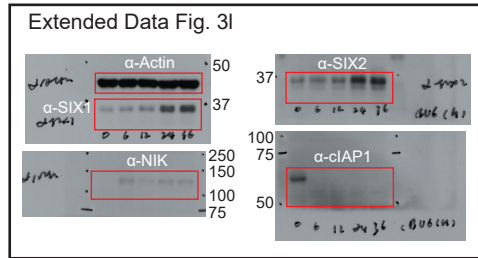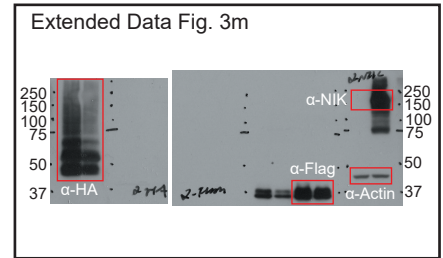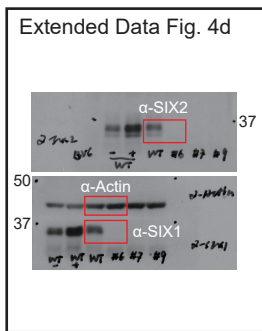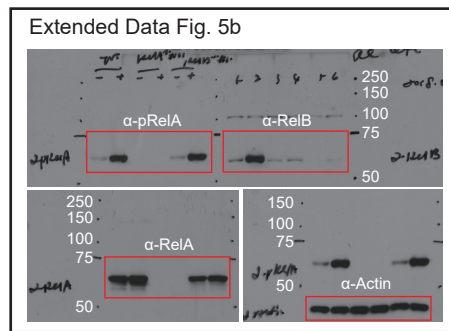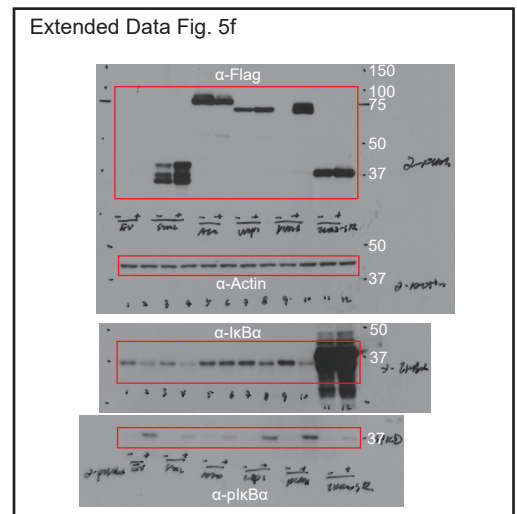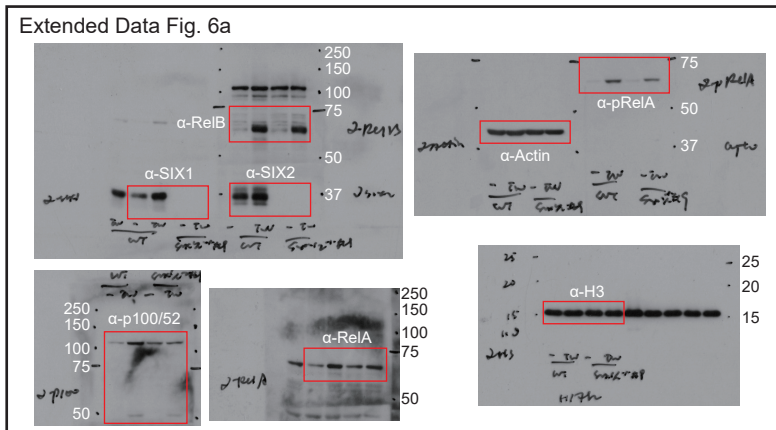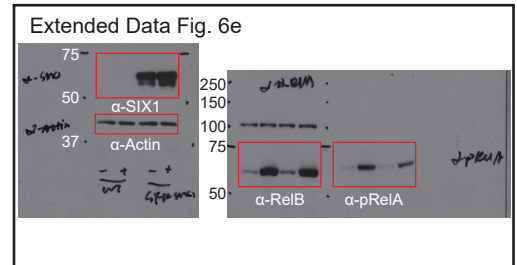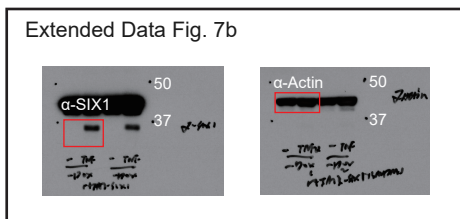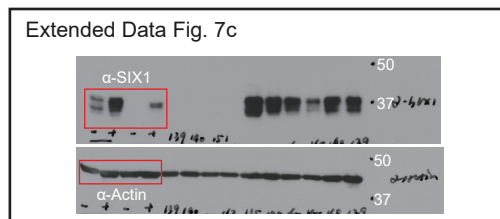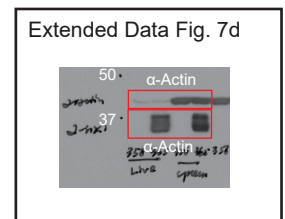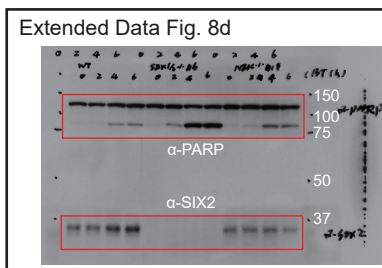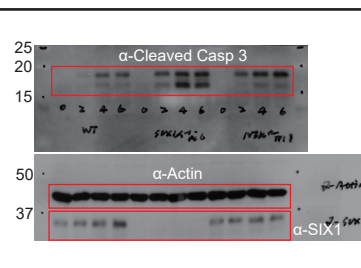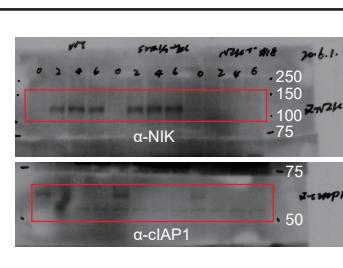

Extended Data Fig. 8f

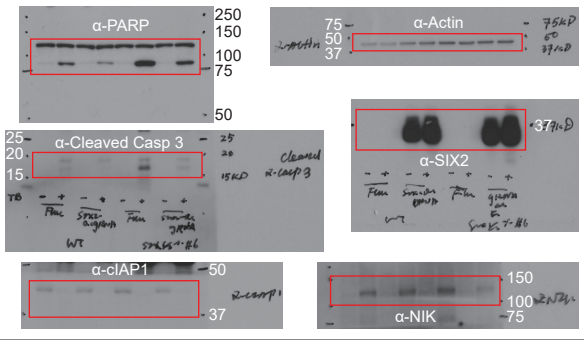

Extended Data Fig. 9a

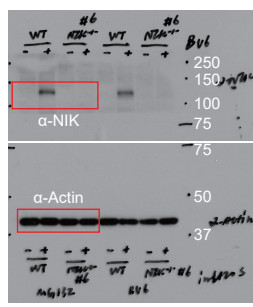

Extended Data Fig. 9c

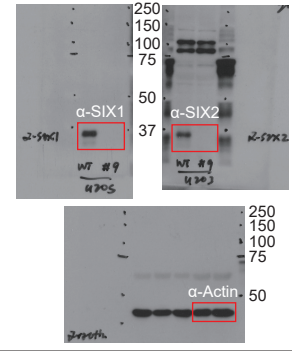

Extended Data Fig. 9i

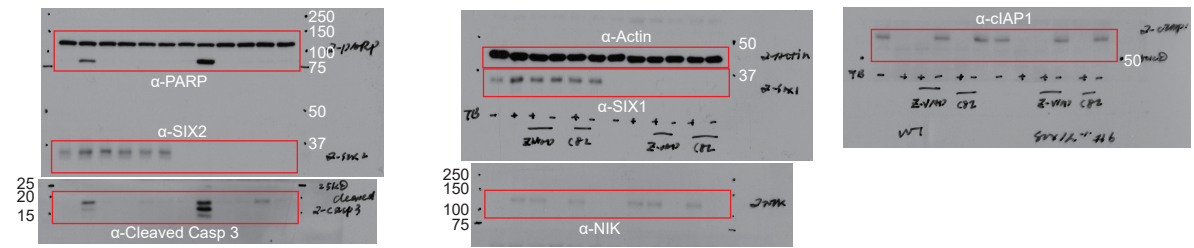

Supplement: NIHMS1522095-supplement-1.pdf [file NIHMS1522095-supplement-1.pdf]
